# Supplementary material
Source: PubMed Central journal article supplement (PMC5257270)
Supplement: NIHMS70980-supplement-Online_Appendix.pdf [file NIHMS70980-supplement-Online_Appendix.pdf]

# **Circulating MicroRNA-122 Is Associated With The Risk of New-Onset Metabolic Syndrome And Type-2-Diabetes**

## **Online Appendix**

**Northern blot.** Hepatic miRNA-122 expression was assessed by Northern blot analysis as previously described (1). Briefly, total RNA (5µg) was separated on a 15% acrylamide TBE 8M urea gel and blotted onto a Hybond N+ nylon filter (Amersham Biosciences). DNA oligonucleotides complementary to mature miR-122 (5'- AAACACCATTGTCACACTCCA-3') were end-labeled with [ $\alpha$ -<sup>32</sup>P] ATP and T<sub>4</sub> polynucleotide kinase (New England Biolabs) to generate high-specific activity probes. Hybridization was carried out according to the ExpressHyb (Clontech) protocol. Following overnight membrane hybridization with specific radiolabeled probes, membranes were washed once for 30min at 42°C in 4x SSC/0.5% SDS and subjected to autoradiography. Blots were re-probed for 5S rRNA (5'- CAGGCCCGACCCTGCTTAGCTTCCGAGAGATCAGACGAGAT-3') to control for equal loading.

**Quantitative real-time PCR (qRT-PCR).** Total RNA was isolated from liver and murine hepatocyte samples using the Bullet Blender Homogenizer (Next Advance) in TRIzol reagent (Invitrogen) according to the manufacturer's protocol. For mRNA quantification, cDNA was synthesized using iScript RT Supermix (Bio-Rad), following the manufacturer's protocol. qRT-PCR analysis was performed in triplicate using iQ SYBR green Supermix (BioRad) on an iCycler Real-Time Detection System (Eppendorf). The mRNA level was normalized to GAPDH or 18S as a house keeping gene (see primer sequence in Supplementary Table 5). For miRNA quantification, total RNA was reverse transcribed using the miScript II RT Kit

(Qiagen). Primers specific for mouse miR-122, miR-27b, miR148a and miR-33a (Qiagen) were used and values normalized to SNORD68 (Qiagen) (see Figure 2B). For gene expression analysis with qRT-PCR, total RNA was reversely transcribed using the high-capacity cDNA RT kit (Life Technologies). RT product (corresponding to 6.75 ng input RNA), 0.25µl Taqman gene expression assay (see Supplementary Table 6) and 2.5µl Taqman Universal PCR Master Mix No AmpErase UNG (2×) were combined in a total volume of 5µl. Cycling conditions were identical to miRNA analysis. GAPDH was used as a normalisation control.

### **Statin Treatment in Mice and Primary Murine Hepatocytes**

Six week old, female C57Bl/6 mice were purchased from Harlan Laboratories (San Pietro al Natisone, Italy) and housed at 22°C under a 12h light/dark cycle under specific pathogen-free conditions with ad libitum access to chow and water. Mice were injected once a day with 20mg/kg atorvastatin intraperitoneally (Sigma Aldrich, Taufkirchen, Germany) for five days. Mice were sacrificed on day 5. Serum was collected by cardiac puncture. The liver was perfused with ice-cold phosphate-buffered saline and tissue specimens from the left lower lobe were either snap frozen or placed in RNAlater (Qiagen, Hilden, Germany) until further processing.

For *in vitro* experiments, primary mouse hepatocytes were isolated as previously described (2). Briefly, mice were anesthetized, the abdomen was opened and liver, vena cava, and portal vein were prepared. The liver was perfused regressively from the abdominal vena cava, via the liver veins (the vena cava proximal to the liver veins was occluded with a microclamp) to the portal vein using a peristaltic pump (Bio-Rad, Hercules, CA). The liver was first perfused using liver perfusion medium 1 supplemented with 0.1mM EGTA at a flow rate of 7 ml/min for 10min. Thereafter, liver perfusion medium 2 containing 30 µg/ml

Liberase TM (Roche, Mannheim, Germany) was used at a flow rate of 3.5 ml/min for another 10min. The liver was removed carefully and transferred into a petri-dish containing L-15 medium (Gibco, Carlsbad, CA). The capsule was incised and the resulting cell suspension was passed through a 100µm cell strainer. Hepatocytes were sedimented by low-speed centrifugation at  $30 \times g$  for 3min. Purity and viability were >90% after an isodensity Percoll centrifugation.  $1.3 \times 10^5$  hepatocytes per  $\text{cm}^2$  were seeded in William's E medium supplemented with 10% FCS and penicillin/streptomycin on collagen-coated 6-well plates. After resting cells overnight, hepatocytes were exposed to 0.1, 10, and 25 µM atorvastatin for 24h. Supernatants were harvested and cells were lysed in Buffer RLT. Both were stored at  $-80^\circ\text{C}$  until further workup.

#### **Plasma Proteomics in the Bruneck cohort**

PlasmaDive kits (Biognosys AG) were used to profile plasma proteins in the Bruneck Study. Plasma samples were processed according to the manufacturer's instructions with one exception: peptide standards were spiked in before and not after tryptic digestion and C18 clean-up. Briefly, 10µl of plasma samples were denatured, reduced and alkylated. 20µg of proteins were spiked with 100 authentic heavy peptide standards. Seven proteins were below the limit of detection. An in-solution digestion was performed overnight. After solid phase extraction with C18 spin columns (96-well format, Harvard apparatus), the eluted peptides were dried using a SpeedVac (Thermo) and resuspended in 40µl of liquid chromatography (LC) solution. The samples were analysed on an Agilent 1290 LC system interfaced to an Agilent 6495 Triple Quadrupole MS. 10µl samples were directly injected onto a 25cm column (AdvanceBio Peptide Map 2.1 x 250mm) and separated over a 23min gradient at 300µl/min. The data were analysed using Skyline software version 3.1 (MacCross Lab) and protein concentrations were calculated using the heavy/light (H/L) ratio.

## **Proteomics of Liver Samples from AntagomiR-122 Treated Mice**

Liver tissue was homogenized using Lysing Matrix D in radioimmunoprecipitation assay buffer (RIPA buffer) and protein concentrations were determined by the bicinchoninic acid assay (BCA). 20ug of protein from each liver sample were denatured with 6M urea/2M thiourea, reduced in 10mM DTT at 37 °C for 1h, and alkylated in 50mM iodoacetamide in the dark for 1h. Proteins were precipitated with ice cold acetone overnight and resuspended in 40 µl of 0.1M TEAB buffer, pH 8.2. Trypsin was added at a trypsin:protein ratio = 1:50 and proteins were digested overnight at 37 °C in agitation. The digestion was stopped by addition of 4 µl of 10% trifluoroacetic acid (TFA). Peptide samples were purified using C18 spin plate (Harvard Apparatus). The eluted peptides were dried using SpeedVac and resuspended in 40µl of 2% ACN + 0.05% TFA resulting in a final peptide-concentration of 0.5 µg/µl.

One microgram of digested peptides was separated using nano-flow HPLC (U3000 RSLCnano, C18 column, 75um ID x 50cm, Thermo Fisher Scientific) with the following gradient: 0-10min, 4%-10% B; 10-75min, 10%-30% B; 75-80min, 30%-40% B; 80-85min, 40%-99% B; 85-90min, 99% B; 90-120min, 4% B; where A=0.1% FA and B=80% ACN, 0.1% FA. The spectra were collected on a Q Exactive HF mass spectrometer (Thermo Fisher Scientific) with full MS scan range 350-1600 m/z (resolution 60,000) and top 15 most abundant precursor ions were selected for MS/MS in Orbitrap (resolution 15,000) with dynamic exclusion enabled. The data were searched against Uniprot mouse database (downloaded from ProteinCenter, version 2015-11-11, 24875 entries) using Proteome Discoverer 2.1 with Sequest HT. The following parameters were used: precursor mass tolerance=10ppm, fragment mass tolerance=0.02Da, trypsin as digestion enzyme and 2 missed cleavages allowed, carbamidomethylation of cysteines was used as fixed modification, oxidation of methionine as variable modification. The search results were loaded into Scaffold (version 4.3.2) and total TIC of each protein was used for quantification.

For TMT labelling, 10 $\mu$ g of peptide digests were concentrated using a SpeedVac and re-suspended at 1 $\mu$ g/ $\mu$ l using 10 $\mu$ l of 50mM TEAB. TMT labelling was carried out according to the manufacturer's instruction (TMT 10plex kit, QK226224, Thermo Fisher Scientific). After labelling, 10 samples were pooled together and dried down. The combined sample, containing a total of 100 $\mu$ g of peptide was then re-suspended in 100 $\mu$ l of 2% ACN + 0.05% TFA (1 $\mu$ g/ $\mu$ l). 1 $\mu$ g of mixed peptides was separated using nano-flow HPLC (U3000 RSLCnano, EASY-SPRAY C18 LC column, 75 $\mu$ m ID x 50cm, Thermo Fisher Scientific) with the following gradient: 0-3min, 4% B; 3-10min, 4%-8%B; 10-200min, 8%-30% B; 200-210min, 30%-40% B; 210-215min, 40%-99%B; 215-220min, 99% B; 220-250min, 4% B; where A=0.1% FA and B=80% ACN, 0.1% FA.

The Synchronous Precursor Selection (SPS)-MS3 method was used on an Orbitrap Fusion Lumos Tribrid mass spectrometer (Thermo Fisher): Full MS on Orbitrap, scan range 375-1500 m/z (resolution 120,000), followed by data-dependant MS2 using CID fragmentation in ion trap using top speed mode with dynamic exclusion enabled, and synchronized precursor selection (SPS)-MS3 on the top 5 ions from the MS2 spectra in Orbitrap scan range 100-500 m/z (resolution 60,000) for the reporter ion using HCD fragmentation. The data were analysed using Proteome Discoverer 2.1. Sequest HT search was performed against UniProt mouse database (downloaded from ProteinCenter, version 2015-11-11, 24875 entries) with the following parameters: precursor mass tolerance=10ppm, fragment mass tolerance=0.6Da, trypsin as digestion enzyme and 2 missed cleavages allowed, carbamidomethylation of cysteines, TMT6plex on N-terminals and lysines, were used as fixed modification, oxidation of methionine as variable modification. The S/N of reporter ions from MS3 spectra were used for quantification with normalization and scaling option enabled.

## References

1. Suárez Y, Fernández-Hernando C, Pober JS, Sessa WC. Dicer dependent microRNAs regulate gene expression and functions in human endothelial cells. *Circ Res* 2007;100:1164–1173.
2. Moschen AR, Gerner R, Schroll A, Fritz T, Kaser A, Tilg H. A key role for Pre-B cell colony-enhancing factor in experimental hepatitis. *Hepatology* 2011;54:675–686.
3. Fong MY, Zhou W, Liu L, et al. Breast-cancer-secreted miR-122 reprograms glucose metabolism in premetastatic niche to promote metastasis. *Nat Cell Biol* 2015;17:183–194.
4. Kojima S, Gatfield D, Esau CC, Green CB. MicroRNA-122 modulates the rhythmic expression profile of the circadian deadenylase Nocturnin in mouse liver. *PLoS One* 2010;5:e11264.
5. Tsai WC, Hsu SD, Hsu CS, et al. MicroRNA-122 plays a critical role in liver homeostasis and hepatocarcinogenesis. *J Clin Invest* 2012;122:2884–2897.
6. Iliopoulos D, Drosatos K, Hiyama Y, Goldberg IJ, Zannis VI. MicroRNA-370 controls the expression of microRNA-122 and Cpt1alpha and affects lipid metabolism. *J Lipid Res* 2010;51:1513–1523.
7. Liu T, Huang Y, Liu J, et al. MicroRNA-122 influences the development of sperm abnormalities from human induced pluripotent stem cells by regulating TNP2 expression. *Stem Cells Dev* 2013;22:1839–1850.
8. Kojima K, Takata A, Vadhais C, et al. MicroRNA122 is a key regulator of  $\alpha$ -fetoprotein expression and influences the aggressiveness of hepatocellular carcinoma. *Nat Commun* 2011;2:338.
9. Davoodian N, Lotfi AS, Soleimani M, Mowla SJ. MicroRNA-122 overexpression promotes hepatic differentiation of human adipose tissue-derived stem cells. *J Cell Biochem* 2014;115:1582–1593.
10. Tanimizu N, Kobayashi S, Ichinohe N, Mitaka T. Downregulation of miR122 by grainyhead-like 2 restricts the hepatocytic differentiation potential of adult liver progenitor cells. *Development* 2014;141:4448–4456.

**Supplementary Table 1** – Effect of antagomiR-122 injection on the hepatic proteome assessed using label-free proteomics. Proteins with P<0.05 are listed. Proteins that were also identified using proteomics with TMT-labelling are shown in **bold**.

| Protein name                                                               | Accession Number | UniProt ID         | Total TIC                    |                                 | Standardised mean difference | P value (unpaired t-test) |
|----------------------------------------------------------------------------|------------------|--------------------|------------------------------|---------------------------------|------------------------------|---------------------------|
|                                                                            |                  |                    | Ctrl-miR (x10 <sup>6</sup> ) | Anti-miR122 (x10 <sup>6</sup> ) |                              |                           |
| Nascent polypeptide-associated complex subunit alpha                       | Q60817           | NACA_MOUSE         | 85±31                        | 186±32                          | 1.66                         | 0.0009                    |
| Nascent polypeptide-associated complex subunit alpha, muscle-specific form | P70670           | NACAM_MOUSE (+1)   | 85±31                        | 186±32                          | 1.66                         | 0.0009                    |
| Dolichol-phosphate mannosyltransferase subunit 3                           | Q9D1Q4           | DPM3_MOUSE         | 5±0                          | 12±2                            | 1.81                         | 0.0015                    |
| Tropomyosin alpha-4 chain                                                  | Q6IRU2           | TPM4_MOUSE         | 10±6                         | 26±4                            | 1.64                         | 0.0015                    |
| Glucokinase                                                                | P52792-1         | HXK4_MOUSE         | 15±7                         | 103±29                          | 1.75                         | 0.0017                    |
| Isoform 2 of Glucokinase                                                   | P52792-2         | HXK4_MOUSE         | 15±7                         | 103±29                          | 1.75                         | 0.0017                    |
| Major vault protein                                                        | Q9EQK5           | MVP_MOUSE          | 82±20                        | 134±17                          | 1.61                         | 0.0021                    |
| ATP synthase F(0) complex subunit B1, mitochondrial                        | Q9CQQ7           | AT5F1_MOUSE        | 572±103                      | 922±145                         | 1.60                         | 0.0029                    |
| Importin-7                                                                 | Q9EPL8           | IPO7_MOUSE         | 15±2                         | 25±1                            | 1.78                         | 0.0033                    |
| 60S ribosomal protein L10A                                                 | P53026           | RL10A_MOUSE        | 228±67                       | 380±35                          | 1.61                         | 0.0040                    |
| NADH dehydrogenase [ubiquinone] iron-sulfur protein 2, mitochondrial       | Q91WD5           | NDUS2_MOUSE        | 150±23                       | 94±22                           | -1.54                        | 0.0046                    |
| Constitutive coactivator of PPAR-gamma-like protein 1                      | Q6A0A9           | F120A_MOUSE        | 14±9                         | 33±5                            | 1.57                         | 0.0047                    |
| Phenylalanine--tRNA ligase alpha subunit                                   | Q8C0C7           | SYFA_MOUSE         | 26±8                         | 53±12                           | 1.57                         | 0.0047                    |
| Proteasome subunit beta type-8                                             | P28063           | PSB8_MOUSE         | 17±4                         | 36±7                            | 1.67                         | 0.0052                    |
| Apolipoprotein B-100                                                       | E9Q414           | APOB_MOUSE         | 14±10                        | 35±6                            | 1.54                         | 0.0058                    |
| Isoleucine--tRNA ligase, cytoplasmic                                       | Q8BU30           | SYIC_MOUSE         | 27±6                         | 14±5                            | -1.52                        | 0.0058                    |
| <b>Carnitine O-palmitoyltransferase 1, liver isoform</b>                   | <b>P97742</b>    | <b>CPT1A_MOUSE</b> | <b>164±42</b>                | <b>254±36</b>                   | <b>1.50</b>                  | <b>0.0066</b>             |
| Prosaposin                                                                 | Q61207           | SAP_MOUSE          | 808±163                      | 1408±301                        | 1.54                         | 0.0074                    |
| V-type proton ATPase subunit G 1                                           | Q9CR51           | VATG1_MOUSE        | 39±9                         | 59±9                            | 1.47                         | 0.0088                    |
| Carbonic anhydrase 2                                                       | P00920           | CAH2_MOUSE         | 176±42                       | 93±32                           | -1.48                        | 0.0088                    |
| Guanine nucleotide-binding protein subunit beta-2-like 1                   | P68040           | GBLP_MOUSE         | 524±69                       | 672±68                          | 1.46                         | 0.0092                    |
| Ras GTPase-activating protein-binding protein 1                            | P97855           | G3BP1_MOUSE        | 26±8                         | 42±6                            | 1.47                         | 0.0095                    |
| Solute carrier family 22 member 1                                          | O08966           | S22A1_MOUSE        | 25±5                         | 34±4                            | 1.45                         | 0.0098                    |
| Tubulin beta-5 chain                                                       | P99024           | TBB5_MOUSE         | 55±47                        | 142±29                          | 1.48                         | 0.0101                    |
| Haloacid dehalogenase-like hydrolase domain-containing protein 3           | Q9CYW4           | HDHD3_MOUSE        | 49±26                        | 97±12                           | 1.52                         | 0.0104                    |
| Isoform 3 of Sec1 family domain-containing protein 1                       | Q8BRF7-3         | SCFD1_MOUSE        | 8±2                          | 14±3                            | 1.54                         | 0.0111                    |
| NADPH:adrenodoxin oxidoreductase, mitochondrial                            | Q61578           | ADRO_MOUSE         | 35±9                         | 13±8                            | -1.55                        | 0.0111                    |
| Sec1 family domain-containing protein 1                                    | Q8BRF7           | SCFD1_MOUSE        | 8±2                          | 14±3                            | 1.54                         | 0.0111                    |
| Isoform 2 of Leukemia inhibitory factor receptor                           | P42703-2         | LIFR_MOUSE         | 94±23                        | 350±28                          | 1.71                         | 0.0115                    |
| Leukemia inhibitory factor receptor                                        | P42703-1         | LIFR_MOUSE         | 94±23                        | 350±28                          | 1.71                         | 0.0115                    |

## Supplementary Table 1 (cont'd)

| Protein name                                                                 | Accession Number | UniProt ID        | Total TIC                    |                                 | Standardised mean difference | P value (unpaired t-test) |
|------------------------------------------------------------------------------|------------------|-------------------|------------------------------|---------------------------------|------------------------------|---------------------------|
|                                                                              |                  |                   | Ctrl-miR (x10 <sup>6</sup> ) | Anti-miR122 (x10 <sup>6</sup> ) |                              |                           |
| Dynein light chain 2, cytoplasmic                                            | Q9D0M5           | DYL2_MOUSE        | 69±58                        | 174±37                          | 1.46                         | 0.0117                    |
| L-lactate dehydrogenase C chain                                              | P00342           | LDHC_MOUSE        | 2680±228                     | 3250±252                        | 1.52                         | 0.0118                    |
| Mitochondrial pyruvate carrier 2                                             | Q9D023           | MPC2_MOUSE        | 326±23                       | 157±90                          | -1.56                        | 0.0118                    |
| ATP-dependent RNA helicase DDX1                                              | Q91VR5           | DDX1_MOUSE        | 16±12                        | 39±3                            | 1.56                         | 0.0122                    |
| <b>Prolow-density lipoprotein receptor-related protein 1</b>                 | <b>Q91ZX7</b>    | <b>LRP1_MOUSE</b> | <b>15±3</b>                  | <b>58±22</b>                    | <b>1.57</b>                  | <b>0.0124</b>             |
| <b>40S ribosomal protein S16</b>                                             | <b>P14131</b>    | <b>RS16_MOUSE</b> | <b>258±75</b>                | <b>446±104</b>                  | <b>1.44</b>                  | <b>0.0128</b>             |
| Putative L-aspartate dehydrogenase                                           | Q9DCQ2           | ASPD_MOUSE        | 298±29                       | 206±52                          | -1.47                        | 0.0129                    |
| Isoform 2 of Polyadenylate-binding protein 2                                 | Q8CCS6-2         | PABP2_MOUSE       | 10±1                         | 4±2                             | -1.67                        | 0.0134                    |
| Polyadenylate-binding protein 2                                              | Q8CCS6           | PABP2_MOUSE       | 10±1                         | 4±2                             | -1.67                        | 0.0134                    |
| 28S ribosomal protein S31, mitochondrial                                     | Q61733           | RT31_MOUSE        | 37±4                         | 23±3                            | -1.67                        | 0.0134                    |
| Lysozyme c-2                                                                 | P08905           | LYZ2_MOUSE        | 5±1                          | 13±1                            | 1.71                         | 0.0135                    |
| Lysozyme c-1                                                                 | P17897           | LYZ1_MOUSE        | 5±1                          | 13±1                            | 1.71                         | 0.0135                    |
| GDH/6PGL endoplasmic bifunctional protein                                    | Q8CFX1           | G6PE_MOUSE        | 83±20                        | 123±20                          | 1.41                         | 0.0135                    |
| S-methyl-5'-thioadenosine phosphorylase                                      | Q9CQ65           | MTAP_MOUSE        | 11±4                         | 30±8                            | 1.65                         | 0.0137                    |
| Profilin-1                                                                   | P62962           | PROF1_MOUSE       | 302±114                      | 510±101                         | 1.39                         | 0.0161                    |
| Endoplasmin                                                                  | P08113           | ENPL_MOUSE        | 1062±226                     | 1500±235                        | 1.38                         | 0.0170                    |
| 40S RIBOSOMAL PROTEIN S6                                                     | P62754           | RS6_MOUSE         | 364±33                       | 558±115                         | 1.50                         | 0.0173                    |
| Peptidyl-prolyl cis-trans isomerase FKBP5                                    | Q64378           | FKBP5_MOUSE       | 6±1                          | 14±5                            | 1.44                         | 0.0174                    |
| Lactoylglutathione lyase                                                     | Q9CPU0           | LGUL_MOUSE        | 764±120                      | 1140±230                        | 1.43                         | 0.0176                    |
| Ran-specific GTPase-activating protein                                       | P34022           | RANG_MOUSE        | 25±8                         | 38±4                            | 1.43                         | 0.0177                    |
| Isoform HSP105-beta of Heat shock protein 105 kDa                            | Q61699-2         | HS105_MOUSE       | 17±7                         | 30±7                            | 1.38                         | 0.0178                    |
| Heat shock protein 105 kDa                                                   | Q61699           | HS105_MOUSE       | 17±7                         | 30±7                            | 1.38                         | 0.0178                    |
| Isoform 2 of 1-phosphatidylinositol 4,5-bisphosphate phosphodiesterase eta-1 | Q4KWH5-2         | PLCH1_MOUSE       | 87±64                        | 194±45                          | 1.39                         | 0.0179                    |
| Isoform 3 of 1-phosphatidylinositol 4,5-bisphosphate phosphodiesterase eta-1 | Q4KWH5-3         | PLCH1_MOUSE       | 87±64                        | 194±45                          | 1.39                         | 0.0179                    |
| Isoform 4 of 1-phosphatidylinositol 4,5-bisphosphate phosphodiesterase eta-1 | Q4KWH5-4         | PLCH1_MOUSE       | 87±64                        | 194±45                          | 1.39                         | 0.0179                    |
| 1-phosphatidylinositol 4,5-bisphosphate phosphodiesterase eta-1              | Q4KWH5           | PLCH1_MOUSE       | 87±64                        | 194±45                          | 1.39                         | 0.0179                    |
| ADP/ATP translocase 1                                                        | P48962           | ADT1_MOUSE        | 1700±412                     | 2400±316                        | 1.38                         | 0.0181                    |
| Sodium/potassium-transporting ATPase subunit beta-1                          | P14094           | AT1B1_MOUSE       | 46±29                        | 93±17                           | 1.41                         | 0.0184                    |
| Regulator of microtubule dynamics protein 2                                  | Q8BSE0           | RMD2_MOUSE        | 14±3                         | 39±16                           | 1.44                         | 0.0195                    |
| Isoform RRP2 of Ribosome-binding protein 1                                   | Q99PL5-10        | RRBP1_MOUSE       | 142±25                       | 290±92                          | 1.47                         | 0.0204                    |
| Isoform RRP5.4 of Ribosome-binding protein 1                                 | Q99PL5-9         | RRBP1_MOUSE       | 142±25                       | 290±92                          | 1.47                         | 0.0204                    |
| Protein LYRIC                                                                | Q80WJ7           | LYRIC_MOUSE       | 9±3                          | 21±8                            | 1.40                         | 0.0208                    |



## Supplementary Table 1 (cont'd)

| Protein name                                            | Accession Number | UniProt ID         | Total TIC                    |                                 | Standardised mean difference | P value (unpaired t-test) |
|---------------------------------------------------------|------------------|--------------------|------------------------------|---------------------------------|------------------------------|---------------------------|
|                                                         |                  |                    | Ctrl-miR (x10 <sup>6</sup> ) | Anti-miR122 (x10 <sup>6</sup> ) |                              |                           |
| Cytoplasmic dynein 1 heavy chain 1                      | Q9JHU4           | DYHC1_MOUSE        | 13±7                         | 28±9                            | 1.35                         | 0.0225                    |
| La-related protein 1                                    | Q6ZQ58-1         | LARP1_MOUSE        | 49±7                         | 30±10                           | -1.45                        | 0.0228                    |
| Aldehyde dehydrogenase family 16 member A1              | Q571I9           | A16A1_MOUSE        | 45±25                        | 89±25                           | 1.33                         | 0.0233                    |
| DnaJ homolog subfamily C member 10                      | Q9DC23           | DJC10_MOUSE        | 20±5                         | 46±9                            | 1.65                         | 0.0239                    |
| Mitochondrial 2-oxoglutarate/malate carrier protein     | Q9CR62           | M2OM_MOUSE         | 38±11                        | 76±26                           | 1.40                         | 0.0253                    |
| <b>60S ribosomal protein L37a</b>                       | <b>P61514</b>    | <b>RL37A_MOUSE</b> | <b>52±17</b>                 | <b>107±37</b>                   | <b>1.39</b>                  | <b>0.0254</b>             |
| <b>40S ribosomal protein S18</b>                        | <b>P62270</b>    | <b>RS18_MOUSE</b>  | <b>420±112</b>               | <b>602±96</b>                   | <b>1.32</b>                  | <b>0.0254</b>             |
| Isoform RRp1.8 of Ribosome-binding protein 1            | Q99PL5-11        | RRBP1_MOUSE        | 152±24                       | 290±92                          | 1.43                         | 0.0262                    |
| Isoform RRp0 of Ribosome-binding protein 1              | Q99PL5-12        | RRBP1_MOUSE        | 152±24                       | 290±92                          | 1.43                         | 0.0262                    |
| Isoform RRp61 of Ribosome-binding protein 1             | Q99PL5-2         | RRBP1_MOUSE        | 184±31                       | 308±84                          | 1.40                         | 0.0265                    |
| Isoform RRp47 of Ribosome-binding protein 1             | Q99PL5-3         | RRBP1_MOUSE        | 184±31                       | 308±84                          | 1.40                         | 0.0265                    |
| Isoform RRp41 of Ribosome-binding protein 1             | Q99PL5-4         | RRBP1_MOUSE        | 184±31                       | 308±84                          | 1.40                         | 0.0265                    |
| Isoform RRp16.8 of Ribosome-binding protein 1           | Q99PL5-5         | RRBP1_MOUSE        | 184±31                       | 308±84                          | 1.40                         | 0.0265                    |
| Isoform RRp15a of Ribosome-binding protein 1            | Q99PL5-6         | RRBP1_MOUSE        | 184±31                       | 308±84                          | 1.40                         | 0.0265                    |
| Isoform RRp15b of Ribosome-binding protein 1            | Q99PL5-7         | RRBP1_MOUSE        | 184±31                       | 308±84                          | 1.40                         | 0.0265                    |
| Isoform RRp10 of Ribosome-binding protein 1             | Q99PL5-8         | RRBP1_MOUSE        | 184±31                       | 308±84                          | 1.40                         | 0.0265                    |
| Mitochondrial coenzyme A transporter SLC25A42           | Q8R0Y8           | S2542_MOUSE        | 6±2                          | 18±8                            | 1.37                         | 0.0267                    |
| Aldehyde dehydrogenase, dimeric NADP-preferring         | P47739           | AL3A1_MOUSE        | 46±16                        | 144±67                          | 1.37                         | 0.0269                    |
| <b>Cytochrome P450 2A12</b>                             | <b>P56593</b>    | <b>CP2AC_MOUSE</b> | <b>198±51</b>                | <b>348±103</b>                  | <b>1.37</b>                  | <b>0.0271</b>             |
| Isoform 3 of APOBEC1 complementation factor             | Q5YD48-3         | A1CF_MOUSE         | 7±1                          | 11±3                            | 1.36                         | 0.0275                    |
| Eukaryotic translation initiation factor 3 subunit D    | O70194           | EIF3D_MOUSE        | 9±2                          | 22±8                            | 1.43                         | 0.0276                    |
| bone marrow stromal antigen 2                           | Q8R2Q8           | BST2_MOUSE         | 10±2                         | 6±2                             | -1.53                        | 0.0277                    |
| Pyridoxal kinase                                        | Q8K183           | PDXK_MOUSE         | 122±32                       | 73±25                           | -1.31                        | 0.0278                    |
| Tetratricopeptide repeat protein 39C                    | Q8VE09           | TT39C_MOUSE        | 29±21                        | 66±16                           | 1.42                         | 0.0293                    |
| Phosphate carrier protein, mitochondrial                | Q8VEM8           | MPCP_MOUSE         | 420±277                      | 824±52                          | 1.42                         | 0.0298                    |
| Ras-related protein Rab-8B                              | P61028           | RAB8B_MOUSE        | 22±6                         | 10±5                            | -1.43                        | 0.0301                    |
| Isoform Alpha of LIM domain and actin-binding protein 1 | Q9ERG0-2         | LIMA1_MOUSE        | 16±5                         | 34±13                           | 1.37                         | 0.0305                    |
| ADP-dependent glucokinase                               | Q8VDL4           | ADPGK_MOUSE        | 9±1                          | 5±1                             | -1.70                        | 0.0307                    |
| Isoform 3 of ADP-dependent glucokinase                  | Q8VDL4-3         | ADPGK_MOUSE        | 9±1                          | 5±1                             | -1.70                        | 0.0307                    |
| 60S ribosomal protein L13a                              | P19253           | RL13A_MOUSE        | 157±115                      | 390±158                         | 1.30                         | 0.0309                    |
| Clathrin light chain A                                  | O08585           | CLCA_MOUSE         | 18±9                         | 34±10                           | 1.29                         | 0.0311                    |
| Nicotinamide phosphoribosyltransferase                  | Q99KQ4           | NAMPT_MOUSE        | 32±10                        | 46±6                            | 1.31                         | 0.0315                    |

## Supplementary Table 1 (cont'd)

| Protein name                                                      | Accession Number | UniProt ID         | Total TIC                    |                                 | Standardised mean difference | P value (unpaired t-test) |
|-------------------------------------------------------------------|------------------|--------------------|------------------------------|---------------------------------|------------------------------|---------------------------|
|                                                                   |                  |                    | Ctrl-miR (x10 <sup>6</sup> ) | Anti-miR122 (x10 <sup>6</sup> ) |                              |                           |
| Isocitrate dehydrogenase [NADP], mitochondrial                    | P54071           | IDHP_MOUSE         | 514±58                       | 616±66                          | 1.28                         | 0.0321                    |
| Isoform 2 of Peroxisomal acyl-coenzyme A oxidase 1                | Q9R0H0-2         | ACOX1_MOUSE        | 102±69                       | 3±3                             | -1.33                        | 0.0323                    |
| 14 kDa phosphohistidine phosphatase                               | Q9DAK9           | PHP14_MOUSE        | 24±16                        | 61±19                           | 1.46                         | 0.0329                    |
| 40S ribosomal protein S28                                         | P62858           | RS28_MOUSE         | 290±55                       | 374±48                          | 1.28                         | 0.0329                    |
| 60S ribosomal protein L10-like                                    | P86048           | RL10L_MOUSE        | 412±147                      | 616±76                          | 1.32                         | 0.0332                    |
| Isoform 2 of Protein FAM63A                                       | Q76LS9-2         | FA63A_MOUSE        | 6±4                          | 21±6                            | 1.60                         | 0.0336                    |
| Protein FAM63A                                                    | Q76LS9-1         | FA63A_MOUSE        | 6±4                          | 21±6                            | 1.60                         | 0.0336                    |
| Isoform 2 of Sulfotransferase family cytosolic 1B member 1        | Q9QWG7-2         | ST1B1_MOUSE        | 16±9                         | 30±1                            | 1.32                         | 0.0340                    |
| Sulfotransferase family cytosolic 1B member 1                     | Q9QWG7-1         | ST1B1_MOUSE        | 16±9                         | 30±1                            | 1.32                         | 0.0340                    |
| <b>60S ribosomal protein L23a</b>                                 | <b>P62751</b>    | <b>RL23A_MOUSE</b> | <b>340±97</b>                | <b>550±150</b>                  | <b>1.29</b>                  | <b>0.0348</b>             |
| Medium-chain specific acyl-CoA dehydrogenase, mitochondrial       | P45952           | ACADM_MOUSE        | 502±100                      | 640±57                          | 1.30                         | 0.0350                    |
| Cytochrome P450 2J5                                               | O54749           | CP2J5_MOUSE        | 20±7                         | 35±10                           | 1.29                         | 0.0351                    |
| Isoform 2 of Clustered mitochondria protein homolog               | Q5SW19-2         | CLU_MOUSE          | 15±3                         | 10±3                            | -1.27                        | 0.0352                    |
| 40S ribosomal protein S8                                          | P62242           | RS8_MOUSE          | 666±71                       | 816±107                         | 1.29                         | 0.0354                    |
| Protein lin-7 homolog C                                           | O88952           | LIN7C_MOUSE        | 17±16                        | 80±42                           | 1.36                         | 0.0356                    |
| Ras-related protein Rab-11B                                       | P46638           | RB11B_MOUSE        | 92±26                        | 131±24                          | 1.26                         | 0.0360                    |
| serine/threonine-protein phosphatase PP1-alpha catalytic subunit  | P62137           | PP1A_MOUSE         | 10±3                         | 35±18                           | 1.35                         | 0.0365                    |
| Glutathione S-transferase theta-2                                 | Q61133           | GSTT2_MOUSE        | 79±27                        | 116±9                           | 1.35                         | 0.0368                    |
| 40S ribosomal protein S11                                         | P62281           | RS11_MOUSE         | 318±35                       | 472±114                         | 1.35                         | 0.0368                    |
| Acyl-coenzyme A thioesterase 13                                   | Q9CQR4           | ACO13_MOUSE        | 67±13                        | 100±25                          | 1.30                         | 0.0376                    |
| Lysosome-associated membrane glycoprotein 1                       | P11438           | LAMP1_MOUSE        | 89±27                        | 137±30                          | 1.31                         | 0.0378                    |
| Transitional endoplasmic reticulum ATPase                         | Q01853           | TERA_MOUSE         | 498±69                       | 614±78                          | 1.25                         | 0.0380                    |
| Isoform 2 of AP-2 complex subunit beta                            | Q9DBG3-2         | AP2B1_MOUSE        | 24±8                         | 42±13                           | 1.28                         | 0.0385                    |
| AP-2 complex subunit beta                                         | Q9DBG3           | AP2B1_MOUSE        | 24±8                         | 42±13                           | 1.28                         | 0.0385                    |
| Aromatic-L-amino-acid decarboxylase                               | O88533           | DDC_MOUSE          | 119±49                       | 184±24                          | 1.30                         | 0.0387                    |
| Peroxiredoxin-6                                                   | O08709           | PRDX6_MOUSE        | 1440±230                     | 1760±167                        | 1.26                         | 0.0388                    |
| Nucleoside diphosphate kinase 3                                   | Q9WV85           | NDK3_MOUSE         | 13±1                         | 27±8                            | 1.45                         | 0.0392                    |
| 40S ribosomal protein S13                                         | P62301           | RS13_MOUSE         | 398±85                       | 526±79                          | 1.25                         | 0.0393                    |
| Mannose-1-phosphate guanylyltransferase alpha                     | Q922H4           | GMPPA_MOUSE        | 8±5                          | 15±4                            | 1.25                         | 0.0394                    |
| N-acyl-aromatic-L-amino acid amidohydrolase (carboxylate-forming) | Q91XE4           | ACY3_MOUSE         | 93±41                        | 150±29                          | 1.26                         | 0.0396                    |
| <b>Granulins</b>                                                  | <b>P28798</b>    | <b>GRN_MOUSE</b>   | <b>73±52</b>                 | <b>142±28</b>                   | <b>1.29</b>                  | <b>0.0397</b>             |
| Aldehyde oxidase 3                                                | G3X982           | AOXC_MOUSE         | 370±117                      | 558±126                         | 1.24                         | 0.0403                    |

## Supplementary Table 1 (cont'd)

| Protein name                                                | Accession Number | UniProt ID         | Total TIC                    |                                 | Standardised mean difference | P value (unpaired t-test) |
|-------------------------------------------------------------|------------------|--------------------|------------------------------|---------------------------------|------------------------------|---------------------------|
|                                                             |                  |                    | Ctrl-miR (x10 <sup>6</sup> ) | Anti-miR122 (x10 <sup>6</sup> ) |                              |                           |
| Isoform Short of Heterogeneous nuclear ribonucleoprotein A1 | P49312-2         | ROA1_MOUSE         | 47±16                        | 80±25                           | 1.26                         | 0.0420                    |
| proteasome subunit beta type-2                              | Q9R1P3           | PSB2_MOUSE         | 44±22                        | 73±12                           | 1.27                         | 0.0425                    |
| Isoform 2 of RNA-binding protein 14                         | Q8C2Q3-2         | RBM14_MOUSE        | 9±2                          | 6±1                             | -1.40                        | 0.0426                    |
| RNA-binding protein 14                                      | Q8C2Q3           | RBM14_MOUSE        | 9±2                          | 6±1                             | -1.40                        | 0.0426                    |
| Isoform 2 of Galectin-9                                     | O08573-2         | LEG9_MOUSE         | 149±73                       | 286±102                         | 1.24                         | 0.0427                    |
| Isoform 3 of Galectin-9                                     | O08573-3         | LEG9_MOUSE         | 149±73                       | 286±102                         | 1.24                         | 0.0427                    |
| Galectin-9                                                  | O08573           | LEG9_MOUSE         | 149±73                       | 286±102                         | 1.24                         | 0.0427                    |
| UV excision repair protein RAD23 homolog B                  | P54728           | RD23B_MOUSE        | 34±6                         | 58±19                           | 1.33                         | 0.0427                    |
| 60S ribosomal protein L7                                    | P14148           | RL7_MOUSE          | 504±61                       | 622±89                          | 1.24                         | 0.0434                    |
| Isoform 3 of Microtubule-associated protein 4               | P27546-3         | MAP4_MOUSE         | 10±3                         | 20±8                            | 1.30                         | 0.0435                    |
| <b>Histidine triad nucleotide-binding protein 1</b>         | <b>P70349</b>    | <b>HINT1_MOUSE</b> | <b>768±223</b>               | <b>428±227</b>                  | <b>-1.23</b>                 | <b>0.0437</b>             |
| Inorganic pyrophosphatase 2, mitochondrial                  | Q91VM9           | IPYR2_MOUSE        | 29±11                        | 61±15                           | 1.55                         | 0.0438                    |
| Glucose-6-phosphate 1-dehydrogenase X                       | Q00612           | G6PD1_MOUSE        | 33±3                         | 8±0                             | -1.72                        | 0.0443                    |
| very long-chain acyl-CoA synthetase                         | O35488           | S27A2_MOUSE        | 264±59                       | 394±101                         | 1.25                         | 0.0443                    |
| Isoform 2 of Heterogeneous nuclear ribonucleoprotein A3     | Q8BG05-2         | ROA3_MOUSE         | 254±67                       | 344±49                          | 1.23                         | 0.0444                    |
| Arylamine N-acetyltransferase 2                             | P50295           | ARY2_MOUSE         | 5±2                          | 8±1                             | 1.31                         | 0.0447                    |
| Cathepsin D                                                 | P18242           | CATD_MOUSE         | 490±108                      | 662±120                         | 1.22                         | 0.0448                    |
| Golgi reassembly-stacking protein 2                         | Q99JX3           | GORS2_MOUSE        | 17±5                         | 10±3                            | -1.37                        | 0.0448                    |
| Ras-related protein Rab-11A                                 | P62492           | RB11A_MOUSE        | 92±26                        | 130±25                          | 1.22                         | 0.0456                    |
| Myosin regulatory light chain 12B                           | Q3THE2           | ML12B_MOUSE        | 98±48                        | 158±15                          | 1.27                         | 0.0466                    |
| Ribonuclease inhibitor                                      | Q91VI7           | RINI_MOUSE         | 136±51                       | 208±45                          | 1.21                         | 0.0469                    |
| UDP-glucuronosyltransferase 1-6                             | Q64435           | UD16_MOUSE         | 69±65                        | 170±71                          | 1.21                         | 0.0469                    |
| Peptidyl-tRNA hydrolase 2, mitochondrial                    | Q8R2Y8           | PTH2_MOUSE         | 6±1                          | 65±47                           | 1.27                         | 0.0470                    |
| Cathepsin B                                                 | P10605           | CATB_MOUSE         | 368±140                      | 560±116                         | 1.22                         | 0.0471                    |
| ATP-binding cassette sub-family B member 9                  | Q9JJ59-1         | ABCB9_MOUSE        | 61±18                        | 104±35                          | 1.25                         | 0.0485                    |
| Isoform 2 of ATP-binding cassette sub-family B member 9     | Q9JJ59-2         | ABCB9_MOUSE        | 61±18                        | 104±35                          | 1.25                         | 0.0485                    |
| Gamma-butyrobetaine dioxygenase                             | Q924Y0           | BODG_MOUSE         | 28±11                        | 49±16                           | 1.22                         | 0.0485                    |
| Isoform 3 of Thioredoxin reductase 2, mitochondrial         | Q9JLT4-3         | TRXR2_MOUSE        | 30±8                         | 18±7                            | -1.30                        | 0.0492                    |
| NADPH--cytochrome P450 reductase                            | P37040           | NCPR_MOUSE         | 252±27                       | 292±28                          | 1.20                         | 0.0492                    |
| 60S ribosomal protein L35                                   | Q6ZWW7           | RL35_MOUSE         | 226±38                       | 364±113                         | 1.28                         | 0.0497                    |

**Supplementary Table 2** – Effect of antagomiR-122 injection on the hepatic proteome assessed using proteomics with TMT-labelling. Proteins with P<0.05 are listed. Proteins that were also identified using label-free proteomics are shown in **bold**.

| Protein name                                         | Accession Number | UniProt ID         | Total TIC                    |                                 | Standardised mean difference | P value (unpaired t-test) |
|------------------------------------------------------|------------------|--------------------|------------------------------|---------------------------------|------------------------------|---------------------------|
|                                                      |                  |                    | Ctrl-miR (x10 <sup>6</sup> ) | Anti-miR122 (x10 <sup>6</sup> ) |                              |                           |
| 40S ribosomal protein S24                            | P16632-1         | RS24_MOUSE         | 87.9±7.5                     | 112.1±7.9                       | 1.65                         | 0.0011                    |
| Heterogeneous nuclear ribonucleoprotein L            | Q8R081           | HNRPL_MOUSE        | 113.0±9.2                    | 87.0±6.7                        | -1.66                        | 0.0012                    |
| 40S ribosomal protein S29                            | P62274           | RS29_MOUSE         | 89.8±8.4                     | 110.2±6.4                       | 1.59                         | 0.0030                    |
| ATP synthase subunit delta, mitochondrial            | Q9D3D9           | ATPD_MOUSE         | 110.7±9.6                    | 89.3±4.9                        | -1.60                        | 0.0045                    |
| tRNA (Cytosine(34)-C(5))-methyltransferase           | Q1HFZ0-1         | NSUN2_MOUSE        | 114.3±13.1                   | 85.7±8.9                        | -1.56                        | 0.0049                    |
| Eukaryotic translation initiation factor 3 subunit L | Q8QZY1           | EIF3L_MOUSE        | 88.7±5.6                     | 111.3±10.7                      | 1.57                         | 0.0055                    |
| Ras GTPase-activating-like protein IQGAP2            | Q3UQ44           | IQGA2_MOUSE        | 92.3±6.5                     | 107.7±6.7                       | 1.51                         | 0.0060                    |
| Protein-glutamine gamma-glutamyltransferase 2        | P21981           | TGM2_MOUSE         | 87.9±10.7                    | 112.1±10.2                      | 1.50                         | 0.0065                    |
| Superoxide dismutase [Cu-Zn]                         | P08228           | SODC_MOUSE         | 103.9±3.9                    | 96.1±2.7                        | -1.51                        | 0.0071                    |
| Serum albumin                                        | P07724           | ALBU_MOUSE         | 115.6±14.2                   | 84.4±13.5                       | -1.49                        | 0.0074                    |
| LIM and SH3 domain protein 1                         | Q61792           | LASP1_MOUSE        | 92.8±2.6                     | 107.2±7.0                       | 1.58                         | 0.0076                    |
| Actin-related protein 3                              | Q99JY9           | ARP3_MOUSE         | 92.3±5.7                     | 107.7±7.7                       | 1.49                         | 0.0078                    |
| Dipeptidyl peptidase 1                               | P97821           | CATC_MOUSE         | 86.5±5.4                     | 113.5±13.5                      | 1.57                         | 0.0081                    |
| Signal recognition particle receptor subunit alpha   | Q9DBG7           | SRPR_MOUSE         | 84.6±8.1                     | 115.4±15.7                      | 1.53                         | 0.0082                    |
| Serine--tRNA ligase, cytoplasmic                     | P26638           | SYSC_MOUSE         | 93.5±5.3                     | 106.5±6.5                       | 1.47                         | 0.0093                    |
| Lupus La protein homolog                             | P32067           | LA_MOUSE           | 92.3±5.4                     | 107.7±8.2                       | 1.48                         | 0.0100                    |
| Coatamer subunit beta                                | Q9JIF7           | COPB_MOUSE         | 93.3±6.5                     | 106.7±6.5                       | 1.43                         | 0.0117                    |
| Myosin light polypeptide 6                           | Q60605           | MYL6_MOUSE         | 91.3±6.4                     | 108.7±9.6                       | 1.46                         | 0.0117                    |
| ATP synthase subunit g, mitochondrial                | Q9CPQ8           | ATP5L_MOUSE        | 103.6±3.4                    | 96.4±3.8                        | -1.42                        | 0.0133                    |
| Proteasome subunit beta type-3                       | Q9R1P1           | PSB3_MOUSE         | 91.8±3.2                     | 108.1±9.2                       | 1.51                         | 0.0137                    |
| <b>60S ribosomal protein L37a</b>                    | <b>P61514</b>    | <b>RL37A_MOUSE</b> | <b>93.9±4.3</b>              | <b>106.0±7.0</b>                | <b>1.44</b>                  | <b>0.0144</b>             |
| Glycerol kinase                                      | Q64516-3         | GLPK_MOUSE         | 93.1±6.1                     | 106.9±7.8                       | 1.41                         | 0.0153                    |
| Mitochondrial glutamate carrier 1                    | Q9D6M3           | GHC1_MOUSE         | 95.1±5.6                     | 104.9±4.6                       | 1.39                         | 0.0164                    |
| Vigilin                                              | Q8VDJ3           | VIGLN_MOUSE        | 96.3±1.3                     | 103.7±4.4                       | 1.50                         | 0.0168                    |
| <b>40S ribosomal protein S18</b>                     | <b>P62270</b>    | <b>RS18_MOUSE</b>  | <b>92.8±4.1</b>              | <b>107.2±8.8</b>                | <b>1.44</b>                  | <b>0.0177</b>             |
| obg-like ATPase 1                                    | Q9CZ30-1         | OLA1_MOUSE         | 96.6±4.1                     | 103.4±1.0                       | 1.49                         | 0.0191                    |
| Apolipoprotein A-I                                   | Q00623           | APOA1_MOUSE        | 115.8±19.6                   | 84.3±7.2                        | -1.45                        | 0.0194                    |
| Translocation protein SEC63 homolog                  | Q8VHE0           | SEC63_MOUSE        | 84.6±18.6                    | 115.4±13.6                      | 1.38                         | 0.0195                    |
| Estradiol 17-beta-dehydrogenase 2                    | P51658           | DHB2_MOUSE         | 89.6±6.3                     | 110.4±13.2                      | 1.42                         | 0.0198                    |
| Isoform LMW of Kininogen-1                           | O08677-2         | KNG1_MOUSE         | 111.4±14.1                   | 88.6±9.8                        | -1.37                        | 0.0203                    |

## Supplementary Table 2 – (cont'd)

| Protein name                                                         | Accession Number | UniProt ID         | Total TIC                    |                                 | Standardised mean difference | P value (unpaired t-test) |
|----------------------------------------------------------------------|------------------|--------------------|------------------------------|---------------------------------|------------------------------|---------------------------|
|                                                                      |                  |                    | Ctrl-miR (x10 <sup>6</sup> ) | Anti-miR122 (x10 <sup>6</sup> ) |                              |                           |
| <b>40S ribosomal protein S16</b>                                     | <b>P14131</b>    | <b>RS16_MOUSE</b>  | <b>91.7±7.8</b>              | <b>108.3±10.1</b>               | <b>1.36</b>                  | <b>0.0207</b>             |
| Signal recognition particle 9 kDa protein                            | P49962           | SRP09_MOUSE        | 93.3±7.2                     | 106.7±7.6                       | 1.35                         | 0.0209                    |
| <b>Granulins</b>                                                     | <b>P28798</b>    | <b>GRN_MOUSE</b>   | <b>88.0±11.7</b>             | <b>111.9±14.5</b>               | <b>1.35</b>                  | <b>0.0216</b>             |
| Myosin-9                                                             | Q8VDD5           | MYH9_MOUSE         | 91.8±9.2                     | 108.2±9.0                       | 1.35                         | 0.0217                    |
| Mitochondrial ornithine transporter 1                                | Q9WVD5           | ORNT1_MOUSE        | 88.1±10.0                    | 111.9±15.4                      | 1.36                         | 0.0230                    |
| Protein transport protein Sec23A                                     | Q01405           | SC23A_MOUSE        | 93.8±7.7                     | 106.2±6.0                       | 1.34                         | 0.0234                    |
| <b>Carnitine O-palmitoyltransferase 1, liver isoform</b>             | <b>P97742</b>    | <b>CPT1A_MOUSE</b> | <b>93.2±8.7</b>              | <b>106.8±6.1</b>                | <b>1.35</b>                  | <b>0.0235</b>             |
| SEC14-like protein 4                                                 | Q8R0F9           | S14L4_MOUSE        | 95.8±3.4                     | 104.2±5.5                       | 1.36                         | 0.0244                    |
| ras-related protein Rab-7a                                           | P51150           | RAB7A_MOUSE        | 92.5±7.7                     | 107.5±9.5                       | 1.32                         | 0.0259                    |
| 60S ribosomal protein L10                                            | Q6ZWV3           | RL10_MOUSE         | 92.5±5.9                     | 107.4±10.1                      | 1.35                         | 0.0268                    |
| Band 3 anion transport protein                                       | P04919           | B3AT_MOUSE         | 115.8±21.5                   | 84.2±12.9                       | -1.34                        | 0.0276                    |
| Beta-ureidopropionase                                                | Q8VC97           | BUP1_MOUSE         | 93.1±9.2                     | 106.9±6.2                       | 1.33                         | 0.0277                    |
| CDGSH iron-sulfur domain-containing protein 3, mitochondrial         | B1AR13           | CISD3_MOUSE        | 90.6±9.8                     | 109.4±12.0                      | 1.31                         | 0.0280                    |
| Ras-related protein Rab-35                                           | Q6PHN9           | RAB35_MOUSE        | 89.4±7.7                     | 110.6±14.9                      | 1.34                         | 0.0297                    |
| 60S ribosomal protein L11                                            | Q9CXW4           | RL11_MOUSE         | 95.2±3.7                     | 104.8±6.8                       | 1.33                         | 0.0307                    |
| Monocarboxylate transporter 1                                        | P53986           | MOT1_MOUSE         | 84.1±8.8                     | 116.0±23.1                      | 1.36                         | 0.0333                    |
| 40S ribosomal protein S20                                            | P60867           | RS20_MOUSE         | 95.4±6.2                     | 104.6±5.1                       | 1.27                         | 0.0344                    |
| Heme-binding protein 1                                               | Q9R257           | HEBP1_MOUSE        | 106.7±3.7                    | 93.3±9.8                        | -1.35                        | 0.0345                    |
| 60S ribosomal protein L36a                                           | P83882           | RL36A_MOUSE        | 89.4±12.0                    | 110.6±14.2                      | 1.27                         | 0.0346                    |
| Isoform 3 of Myosin-14                                               | Q6URW6-3         | MYH14_MOUSE        | 117.2±24.9                   | 82.8±15.3                       | -1.29                        | 0.0356                    |
| 60S ribosomal protein L26                                            | P61255           | RL26_MOUSE         | 95.1±5.3                     | 104.9±6.7                       | 1.27                         | 0.0357                    |
| 26S proteasome non-ATPase regulatory subunit 3                       | P14685           | PSMD3_MOUSE        | 94.8±7.3                     | 105.2±5.3                       | 1.28                         | 0.0358                    |
| NADH dehydrogenase [ubiquinone] 1 alpha subcomplex subunit 2         | Q9CQ75           | NDUA2_MOUSE        | 106.0±8.6                    | 94.0±6.0                        | -1.28                        | 0.0359                    |
| Eukaryotic peptide chain release factor subunit 1                    | Q8BWW3           | ERF1_MOUSE         | 110.5±13.2                   | 89.5±13.3                       | -1.26                        | 0.0365                    |
| Polypyrimidine tract-binding protein 1                               | P17225           | PTBP1_MOUSE        | 93.0±9.3                     | 107.0±8.3                       | 1.26                         | 0.0369                    |
| Malate dehydrogenase, cytoplasmic                                    | P14152           | MDHC_MOUSE         | 103.9±4.6                    | 96.1±5.3                        | -1.26                        | 0.0372                    |
| Tubulin alpha-1C chain                                               | P68373           | TBA1C_MOUSE        | 96.6±1.9                     | 103.4±5.1                       | 1.33                         | 0.0372                    |
| peptidyl-prolyl cis-trans isomerase D                                | Q9CR16           | PPID_MOUSE         | 95.1±6.5                     | 104.9±6.0                       | 1.25                         | 0.0385                    |
| Clathrin heavy chain 1                                               | Q68FD5           | CLH1_MOUSE         | 97.7±3.1                     | 102.3±2.9                       | 1.25                         | 0.0394                    |
| Thymosin beta-4                                                      | P20065           | TYB4_MOUSE         | 83.0±6.4                     | 117.0±25.7                      | 1.35                         | 0.0394                    |
| Cytosol aminopeptidase                                               | Q9CPY7-1         | AMPL_MOUSE         | 102.7±2.1                    | 97.3±4.1                        | -1.29                        | 0.0405                    |
| NADH dehydrogenase [ubiquinone] iron-sulfur protein 3, mitochondrial | Q9DCT2           | NDUS3_MOUSE        | 106.9±5.0                    | 93.1±10.6                       | -1.30                        | 0.0406                    |

## Supplementary Table 2 – (cont'd)

| Protein name                                                             | Accession Number | UniProt ID         | Total TIC                    |                                 | Standardised mean difference | P value (unpaired t-test) |
|--------------------------------------------------------------------------|------------------|--------------------|------------------------------|---------------------------------|------------------------------|---------------------------|
|                                                                          |                  |                    | Ctrl-miR (x10 <sup>6</sup> ) | Anti-miR122 (x10 <sup>6</sup> ) |                              |                           |
| DNA damage-binding protein 1                                             | Q3U1J4           | DDB1_MOUSE         | 95.6±5.0                     | 104.4±6.3                       | 1.24                         | 0.0411                    |
| <b>Prolow-density lipoprotein receptor-related protein 1</b>             | <b>Q91ZX7</b>    | <b>LRP1_MOUSE</b>  | <b>95.2±6.6</b>              | <b>104.8±5.9</b>                | <b>1.24</b>                  | <b>0.0411</b>             |
| Succinate dehydrogenase [ubiquinone] flavoprotein subunit, mitochondrial | Q8K2B3           | SDHA_MOUSE         | 102.9±3.8                    | 97.1±3.9                        | -1.24                        | 0.0413                    |
| Fatty acid-binding protein 9                                             | O08716           | FABP9_MOUSE        | 84.9±16.3                    | 115.1±22.0                      | 1.24                         | 0.0419                    |
| Integrin alpha-1                                                         | Q3V3R4           | ITAI_MOUSE         | 91.2±11.4                    | 108.8±11.6                      | 1.23                         | 0.0421                    |
| 60S acidic ribosomal protein P1                                          | P47955           | RLA1_MOUSE         | 94.8±7.1                     | 105.2±6.4                       | 1.23                         | 0.0426                    |
| 5-hydroxyisourate hydrolase                                              | Q9CRB3           | HIUH_MOUSE         | 104.4±5.6                    | 95.6±5.9                        | -1.23                        | 0.0431                    |
| 60S ribosomal protein L18                                                | P35980           | RL18_MOUSE         | 95.6±3.8                     | 104.4±6.9                       | 1.27                         | 0.0435                    |
| Spliceosome RNA helicase DDX39B                                          | Q9Z1N5           | DX39B_MOUSE        | 94.1±6.8                     | 105.9±8.5                       | 1.23                         | 0.0437                    |
| Plasminogen                                                              | P20918           | PLMN_MOUSE         | 110.0±10.4                   | 90.0±15.1                       | -1.24                        | 0.0444                    |
| Fatty aldehyde dehydrogenase                                             | P47740           | AL3A2_MOUSE        | 94.5±6.1                     | 105.5±8.2                       | 1.23                         | 0.0450                    |
| Succinate dehydrogenase [ubiquinone] iron-sulfur subunit, mitochondrial  | Q9CQA3           | SDHB_MOUSE         | 103.3±1.3                    | 96.7±5.2                        | -1.32                        | 0.0450                    |
| 60S ribosomal protein L30                                                | P62889           | RL30_MOUSE         | 94.6±6.3                     | 105.4±8.0                       | 1.22                         | 0.0454                    |
| Coatomer subunit alpha                                                   | Q8CIE6           | COPA_MOUSE         | 94.6±3.0                     | 105.5±8.7                       | 1.30                         | 0.0461                    |
| 14-3-3 protein beta/alpha                                                | Q9CQV8-1         | 1433B_MOUSE        | 96.8±2.5                     | 103.2±5.1                       | 1.26                         | 0.0462                    |
| <b>Histidine triad nucleotide-binding protein 1</b>                      | <b>P70349</b>    | <b>HINT1_MOUSE</b> | <b>105.7±7.9</b>             | <b>94.4±7.4</b>                 | <b>-1.21</b>                 | <b>0.0475</b>             |
| Alpha-1-antitrypsin 1-2                                                  | P22599           | A1AT2_MOUSE        | 111.6±18.7                   | 88.4±9.4                        | -1.25                        | 0.0478                    |
| <b>60S ribosomal protein L23a</b>                                        | <b>P62751</b>    | <b>RL23A_MOUSE</b> | <b>92.3±7.5</b>              | <b>107.7±12.2</b>               | <b>1.23</b>                  | <b>0.0481</b>             |
| Prostaglandin E synthase 3                                               | Q9R0Q7           | TEBP_MOUSE         | 95.4±2.7                     | 104.6±7.4                       | 1.28                         | 0.0489                    |
| <b>Cytochrome P450 2A12</b>                                              | <b>P56593</b>    | <b>CP2AC_MOUSE</b> | <b>93.7±5.6</b>              | <b>106.3±10.2</b>               | <b>1.24</b>                  | <b>0.0490</b>             |
| 60S ribosomal protein L22                                                | P67984           | RL22_MOUSE         | 78.8±30.1                    | 121.2±27.9                      | 1.20                         | 0.0495                    |

**Supplementary Table 3** – Predicted direct miR-122 targets and corresponding results from unlabelled and TMT-labelled proteomics.

| Gene mouse (HUMAN) | Uniprot Name | Predicted mouse (x/12) | Predicted human (x/12) | Previously validated        | Unlabelled proteomics | TMT-labelled proteomics |
|--------------------|--------------|------------------------|------------------------|-----------------------------|-----------------------|-------------------------|
| Pkm                | KPYM_MOUSE   | 9                      | 7                      | Luc Hs (3)                  | -                     | -                       |
| Aldh3a2            | AL3A2_MOUSE  | 6                      | 5                      | -                           | -                     | ↑                       |
| Ccm4l              | NOCT_MOUSE   | 7                      | 4                      | Luc Mm (4)                  | n.i.                  | n.i.                    |
| Fads1              | FADS1_MOUSE  | 3                      | 6                      | -                           | -                     | n.i.                    |
| Igf2               | IGF2_MOUSE   | 6                      | 3                      | Other Mm (5)                | n.i.                  | n.i.                    |
| Myh9               | MYH9_MOUSE   | 4                      | 5                      | -                           | -                     | ↑                       |
| Cpt1a              | CPT1A_MOUSE  | 3                      | 5                      | Other Mm (6)                | ↑                     | ↑                       |
| Lgals3bp           | LG3BP_MOUSE  | 5                      | 3                      | Other Hs (7)                | -                     | n.i.                    |
| Rab27a             | RB27A_MOUSE  | 3                      | 5                      | -                           | n.i.                  | n.i.                    |
| Tuba1c             | TBA1C_MOUSE  | 1                      | 7                      | -                           | -                     | ↑                       |
| Eif3i              | EIF3I_MOUSE  | 0                      | 7                      | -                           | -                     | -                       |
| Lrp1               | LRP1_MOUSE   | 3                      | 4                      | -                           | ↑                     | ↑                       |
| Slc16a1            | MOT1_MOUSE   | 5                      | 1                      | -                           | -                     | ↑                       |
| Slc25a15           | ORNT1_MOUSE  | 2                      | 4                      | -                           | -                     | ↑                       |
| Auh                | AUHM_MOUSE   | 4                      | 1                      | -                           | -                     | -                       |
| Ldha               | LDHA_MOUSE   | 4                      | 1                      | -                           | -                     | -                       |
| Rpl23a             | RL23A_MOUSE  | 1                      | 4                      | -                           | ↑                     | ↑                       |
| Acs1l              | ACSL1_MOUSE  | 2                      | 2                      | -                           | n.i.                  | -                       |
| Apob               | APOB_MOUSE   | 3                      | 1                      | Other Hs (7)                | ↑                     | -                       |
| Vapa               | VAPA_MOUSE   | 2                      | 2                      | -                           | -                     | -                       |
| Iqgap2             | IQGA2_MOUSE  | 1                      | 2                      | -                           | -                     | ↑                       |
| Afp                | FETA_MOUSE   | 1                      | 1                      | Other Hs (8), Other Mm (5)  | n.i.                  | n.i.                    |
| Alb                | ALBU_MOUSE   | 0                      | 2                      | Other Hs (9), Other Mm (10) | -                     | ↓                       |
| Apoa1              | APOA1_MOUSE  | 1                      | 1                      | -                           | -                     | ↓                       |
| Asgr1              | ASGR1_MOUSE  | 1                      | 1                      | -                           | -                     | -                       |
| Gm                 | GRN_MOUSE    | 1                      | 1                      | -                           | ↑                     | ↑                       |
| Hint1              | HINT1_MOUSE  | 1                      | 1                      | -                           | ↓                     | ↓                       |
| Rpl37a             | RL37A_MOUSE  | 1                      | 1                      | -                           | ↑                     | ↑                       |
| Cyp2a12 (CYP2A13)  | CP2AC_MOUSE  | 0                      | 1                      | -                           | ↑                     | ↑                       |
| Rps16              | RS16_MOUSE   | 1                      | 0                      | -                           | ↑                     | ↑                       |
| Rps18              | RS18_MOUSE   | 0                      | 0                      | -                           | ↑                     | ↑                       |

Abbreviations: Other = Other miR-122 experiments in which the respective genes were regulated, not direct evidence for the gene being a target of miR-122; Luc = validation using luciferase assay; Hs = validation in human system or sequence; Mm = validation in mouse system or sequence; n.i. = not identified.

**Supplementary Table 4 – MiRNAs in human HDL and VLDL.**

|                | miRNA expression, C <sub>t</sub> |                       |
|----------------|----------------------------------|-----------------------|
|                | VLDL particle                    | HDL particle          |
| miR-24         | 28.8                             | 32.0                  |
| miR-92a        | 31.8                             | 35.8                  |
| <i>miR-122</i> | <i>Not detectable</i>            | <i>Not detectable</i> |
| miR-126        | 30.0                             | 29.1                  |
| miR-146a       | 30.9                             | 36.1                  |
| miR-191        | 30.0                             | 33.9                  |
| miR-223        | 23.5                             | 24.8                  |

MiRNAs were measured using RNA extracted from human HDL and VLDL samples. C<sub>t</sub>, Cycle threshold.



**Supplementary Table 5** – Primer sequences used to quantify expression of genes implicated in cholesterol and lipid metabolism at the mRNA level in antagomiR-122 treated mice, related to Fig. 2.

| <b>Gene</b>   | <b>Forward (5'→3')</b>   | <b>Reverse (3'→5')</b>    |
|---------------|--------------------------|---------------------------|
| <i>18S</i>    | TTCCGATAACGAACGAGACTCT   | TGGCTGAACGCCACTTGTC       |
| <i>Acc1</i>   | ATCCAGGCCATGTTGAGACG     | AGATGTGCTGGGTCATGTGG      |
| <i>Acly</i>   | ATGCGAGTGCAGATCC         | AAGGTAGTGCCCAATG          |
| <i>Aldo</i>   | TGAATAGGCTGCGTTCTCTTG    | GCAGTGCTTTCTTTCCTAACTC    |
| <i>Ampk</i>   | TGACCGGACATAAAGTGGCTGTGA | TGATGATGTGAGGGTGCCTGAACA  |
| <i>Cpt1</i>   | TTGATCAAGAAGTGCCGGACGAGT | GTCCATCATGGCCAGCACAAAGTT  |
| <i>Fasn</i>   | CTTCGCCAACTCTACCATGG     | TCCACACCCATGAGCGAGT       |
| <i>Gapdh</i>  | ACACATTGGGGGTAGGAACA     | AACTTTGGCATTGTGGAAGG      |
| <i>Hmgcr</i>  | CTTGTGGAATGCCTTGTGATTG   | AGCCGAAGCAGCACATGAT       |
| <i>Ldlr</i>   | GGTACTGGCAACCACCATTGGG   | GCCAATCGACTCACGGGTTTCAG   |
| <i>Mtp</i>    | AGGCAATTTCGAGACAAAG      | ACGTCAAAGCATATCGTTC       |
| <i>Scd1</i>   | CTGGAGATCTCTGGAGCATGTGGG | TACCCTTTGCTGGCAGCCGA      |
| <i>Srebp1</i> | GCAGCCACCATCTAGCCTG      | CAGCAGTGAGTCTCTGCCTTGAT   |
| <i>Srebp2</i> | GCGTTCTGGAGACCATGGA      | ACAAAGTTGCTCTGAAAACAAATCA |

**Supplementary Table 6** – Taqman assays used in Supplementary Fig. 3.

| <b>Gene</b> | <b>Taqman ID</b> |
|-------------|------------------|
| Acs1l       | Mm00484217_m1    |
| Afm         | Mm00446866_m1    |
| Afp         | Mm00431715_m1    |
| Ahsg        | Mm01145470_m1    |
| Alb         | Mm00802090_m1    |
| Aldh3a2     | Mm00839320_m1    |
| Apoa1       | Mm00437569_m1    |
| Apob        | Mm01545150_m1    |
| Apoc2       | Mm00437571_m1    |
| Apoc3       | Mm00445670_m1    |
| Apoe        | Mm01307193_g1    |
| Asgr1       | Mm01245581_m1    |
| Auh         | Mm00479363_m1    |
| Azgp1       | Mm00516331_m1    |
| C3          | Mm01232785_m1    |
| Ccrn4l      | Mm00802276_m1    |
| Cebpa       | Mm00514283_s1    |
| Cfh         | Mm01299248_m1    |
| Cfi         | Mm00432477_m1    |
| Cpt1a       | Mm01231183_m1    |
| Crp         | Mm00432680_g1    |
| Ctsd        | Mm00515586_m1    |
| Cyp2a12     | Mm00504878_m1    |
| Eif3i       | Mm00517000_m1    |
| Fads1       | Mm00507605_m1    |
| Gapdh       | Mm03302249_g1    |
| Gpt         | Mm00805379_g1    |
| Gri         | Mm00433848_m1    |
| Hint1       | Mm00801722_m1    |
| Hp          | Mm00516884_m1    |
| Igf1        | Mm00439560_m1    |
| Igf2        | Mm00439564_m1    |
| Iqgap2      | Mm01282618_m1    |
| Ldha        | Mm01612132_g1    |
| Lgals3bp    | Mm00478303_m1    |
| Lox         | Mm00495386_m1    |
| Lrg1        | Mm01278767_m1    |
| Lrp1        | Mm00464608_m1    |
| Myh9        | Mm01197036_m1    |
| Pcsk9       | Mm01263610_m1    |
| Pkm         | Mm00834102_gH    |
| Rab27a      | Mm00469997_m1    |
| Rpl23a      | Mm03020030_g1    |
| Rpl37a      | Mm01546394_s1    |
| Rps16       | Mm01617540_g1    |
| Rps18       | Mm02601777_g1    |
| Slc16a1     | Mm01306379_m1    |
| Slc25a15    | Mm01222280_m1    |
| Sort1       | Mm00490905_m1    |
| Trib1       | Mm00454875_m1    |
| Tuba1c      | Mm02528102_g1    |
| Vapa        | Mm00497141_m1    |
| Vim         | Mm01333430_m1    |
| Vtn         | Mm00495976_m1    |

**Supplementary Figure 1** – Correlation of miR-122 over time and in serum vs. plasma in the Bruneck Study.

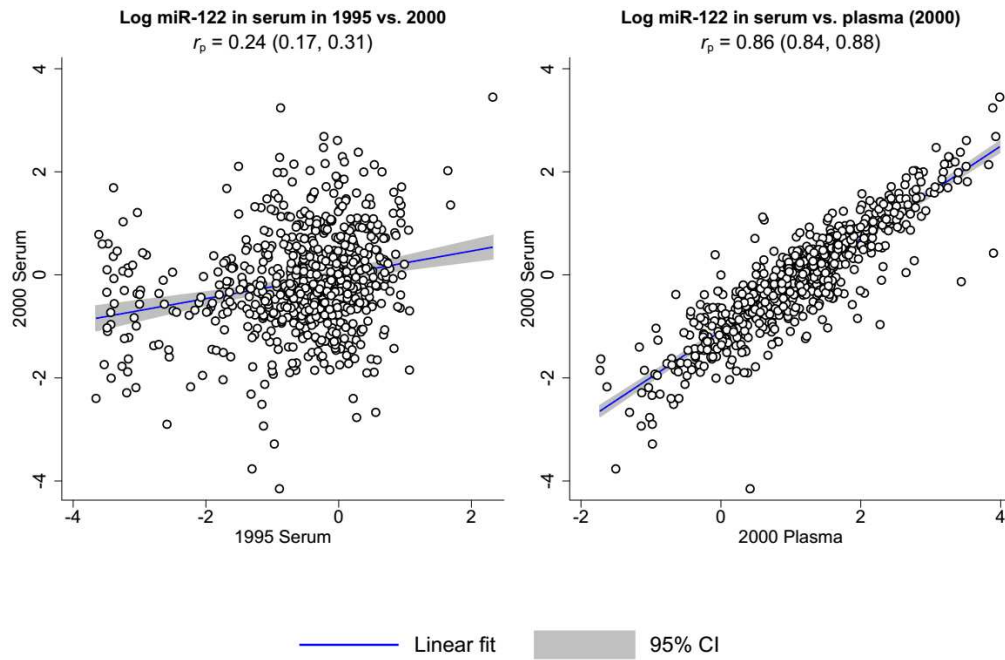

MiRNA values were log-transformed for analysis.

**Supplementary Figure 2** – Correlation of serum miR-122 with circulating levels of proteins in the Bruneck Study.

|              |              |              |             |             |             |              |             |              |              |
|--------------|--------------|--------------|-------------|-------------|-------------|--------------|-------------|--------------|--------------|
| <b>ZA2G</b>  | <b>A2GL</b>  | <b>APOA4</b> | <b>APOD</b> | <b>CO9</b>  | <b>SHBG</b> | <b>GELS</b>  | <b>AACT</b> | <b>IGHG3</b> | <b>SEPP1</b> |
| CO6          | FBLN1        | APOA1        | IGHG4       | IC1         | AMBP        | A2AP         | F13A        | C1R          | FIBA         |
| APOM         | CO8A         | CERU         | HPTR        | ANT3        | VTDB        | ITIH4        | IGHG2       | C1QC         | IGHGs        |
| HPT          | TETN         | HEMO         | PLF4        | ANGT        | ITIH1       | C1S          | C1QB        | KLKB1        | A1AT         |
| IGHM         | RET4         | CD5L         | ITIH2       | APOC1       | A1AG1       | GPX3         | SAA4        | FINC         | A1AG2        |
| MBL2         | CPN2         | IGHG1        | HRG         | APOH        | CLUS        | C4BPA        | ALBU        | PGRP2        | A2MG         |
| IGJ          | A1BG         | THRB         | HBA         | IGHA1       | PEDF        | HBD          | THBG        | CO5          | TTHY         |
| HEP2         | KNG1         | IGHA2        | CBG         | APOA2       | CO2         | TRFE         | PLMN        | CFAB         | <b>CO7</b>   |
| <b>APOL1</b> | <b>APOC3</b> | <b>FETUA</b> | <b>APOB</b> | <b>CFAI</b> | <b>APOE</b> | <b>APOC2</b> | <b>CFAH</b> | <b>FCN3</b>  | <b>CO3</b>   |
| <b>VTNC</b>  | <b>AFAM</b>  |              |             |             |             |              |             |              |              |

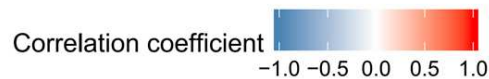

Spearman correlation coefficients were adjusted for age and sex. Proteins in bold were significant after Bonferroni-correction for multiple testing. Abbreviations: A1AG1, alpha-1-acid glycoprotein 1; A1AG2, alpha-1-acid glycoprotein 2; A1AT, alpha-1-antitrypsin; A1BG, alpha-1B-glycoprotein; A2AP, alpha-2-antiplasmin; A2GL, leucine-rich alpha-2-glycoprotein; A2MG, alpha-2-macroglobulin; AACT, alpha-1-antichymotrypsin; AFAM, afamin; ALBU, albumin; AMBP, alpha-1-microglobulin; ANGT, angiotensinogen; ANT3, antithrombin-III; APOA1, apolipoprotein A-I; APOA2, apolipoprotein A-II; APOA4, apolipoprotein A-IV; APOB, apolipoprotein B-100; APOC1, apolipoprotein C-I; APOC2, apolipoprotein C-II; APOC3, apolipoprotein C-III; APOD, apolipoprotein D; APOE, apolipoprotein E; APOH, apolipoprotein H; APOL1, apolipoprotein L1; APOM, apolipoprotein M; C1QB, complement C1q subcomponent subunit B; C1QC, complement

C1q subcomponent subunit C; C1R, complement C1r subcomponent; C1S, complement C1s subcomponent; C4BPA, C4b-binding protein alpha chain; CBG, corticosteroid-binding globulin; CD5L, CD5 antigen-like; CERU, ceruloplasmin; CFAB, complement factor B; CFAH, complement factor H; CFAI, complement factor I; CLUS, clusterin; CO2, complement C2; CO3, complement C3; CO5, complement C5; CO6, complement C6; CO7, complement C7; CO8A, complement C8 alpha chain; CO9, complement C9; CPN2, carboxypeptidase N subunit 2; F13A, coagulation factor XIII A chain; FBLN1, fibulin-1; FCN3, ficolin-3; FETUA, fetuin A; FIBA, fibrinogen alpha chain; FINC, fibronectin; GELS, gelsolin; GPX3, glutathione peroxidase 3; HBA, hemoglobin subunit alpha; HBD, hemoglobin subunit delta; HEMO, hemopexin; HEP2, heparin cofactor 2; HPT, haptoglobin; HPTR, haptoglobin-related protein; HRG, histidine-rich glycoprotein; IC1, plasma protease C1 inhibitor; IGHA1, immunoglobulin alpha 1; IGHA2, immunoglobulin alpha 2; IGHGs, immunoglobulin gamma; IGHG1, immunoglobulin gamma 1; IGHG2, immunoglobulin gamma 2; IGHG3, immunoglobulin gamma 3; IGHG4, immunoglobulin gamma 4; IGHM, immunoglobulin mu; IGJ, immunoglobulin J; ITIH1, inter-alpha-trypsin inhibitor heavy chain 1; ITIH2, inter-alpha-trypsin inhibitor heavy chain 2; ITIH4, inter-alpha-trypsin inhibitor heavy chain 4; KLKB1, kallikrein; KNG1, kininogen-1; MBL2, mannose-binding protein C; PEDF, pigment epithelium-derived factor; PGRP2, N-acetylmuramoyl-L-alanine amidase; PLF4, platelet factor 4; PLMN, plasminogen; RET4, retinol-binding protein 4; SAA4, serum amyloid A-4 protein; SEPP1, selenoprotein P; SHBG, sex hormone-binding globulin; TETN, tetranectin; THBG, thyroxine-binding globulin; THRB, prothrombin; TRFE, serotransferrin; TTHY, transthyretin; VTDB, vitamin D-binding protein; VTNC, vitronectin; ZA2G, zinc-alpha-2-glycoprotein.

**Supplementary Figure 3** – (A) Volcano plots of all the qPCR data from antagomir-122 treated versus control liver samples, with the genes with  $P < 0.05$  highlighted in red. Details on the Taqman assay used is provided in Supplementary Table 6. (B) Detailed results for genes differentially expressed in the antagomiR-122 group vs. the control group, i.e. Alpha-fetoprotein, (Afp), IQ motif containing GTPase activating protein 2 (Iqgap2), and Ras-related protein (Rab27).

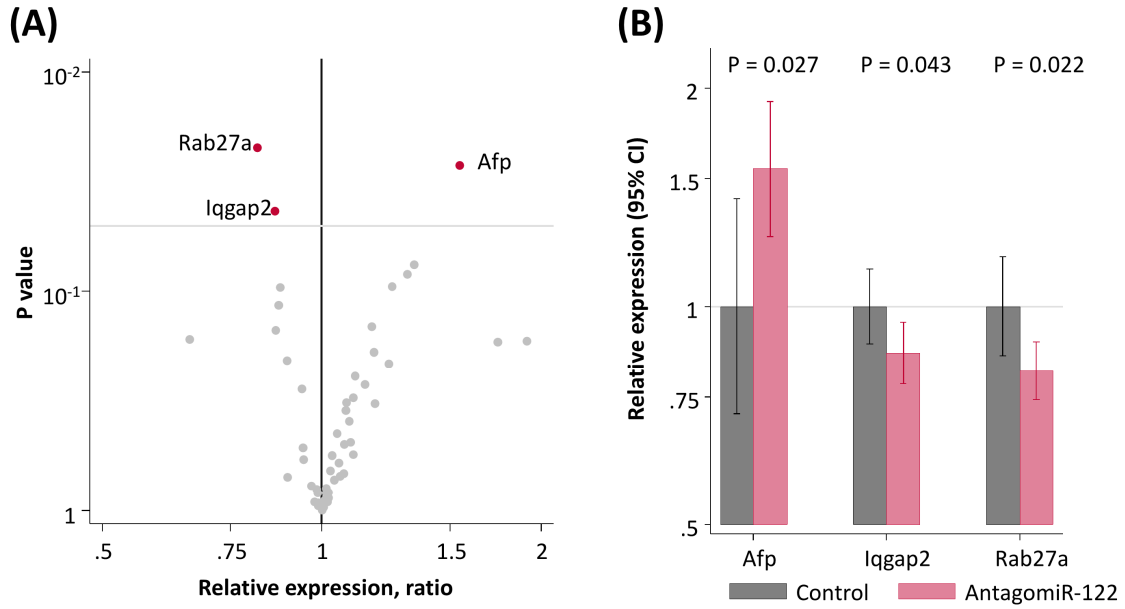

**Supplementary Figure 4** – Association of miR-122 with metabolic syndrome and type-2 diabetes across clinically relevant subgroups in the Bruneck Study.

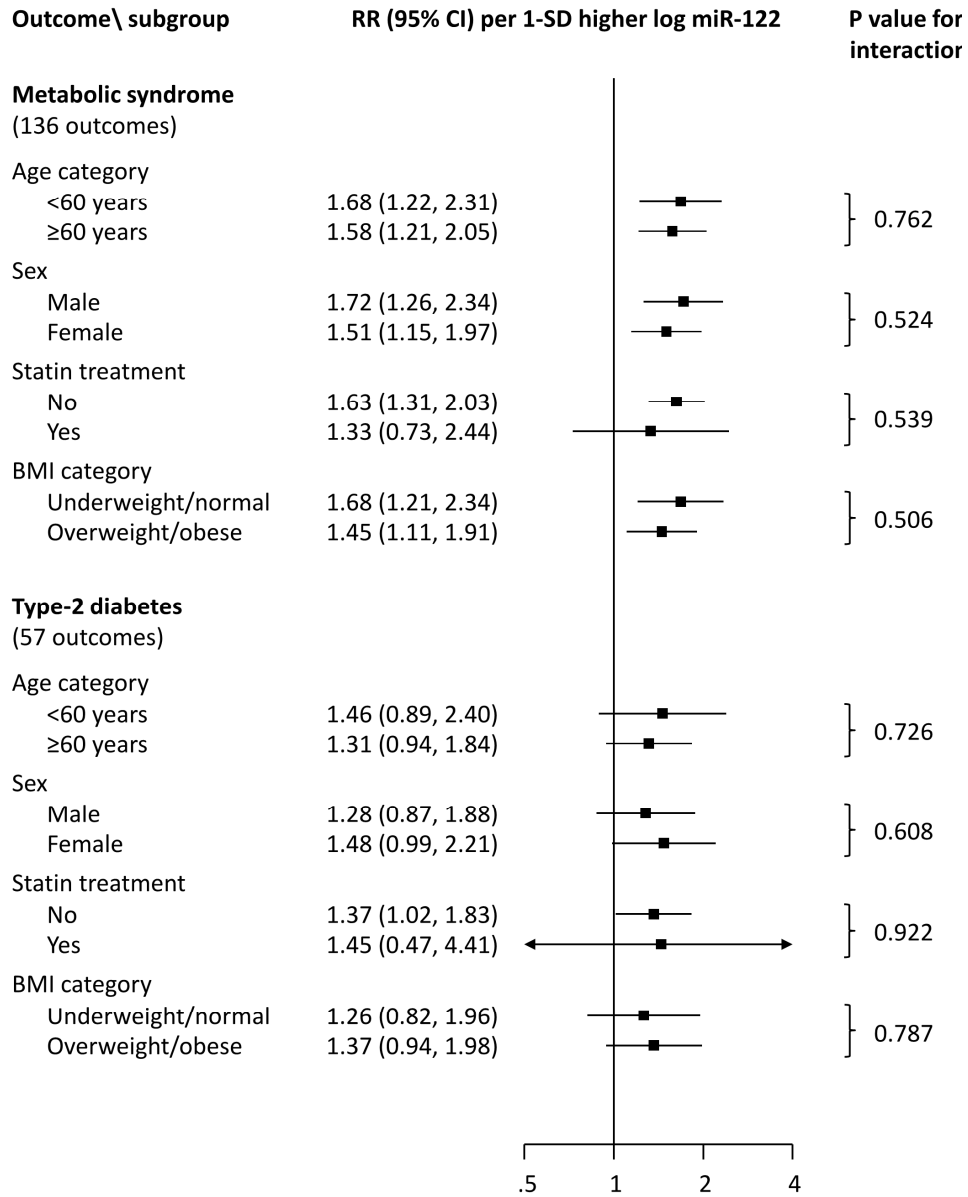

Risk ratios were adjusted for age, sex, socio-economic status, smoking, physical activity, and alcohol consumption.

**Supplementary Figure 5** – Association of miR-122 with new-onset cardiovascular disease overall and across clinically relevant subgroups in the Bruneck Study.

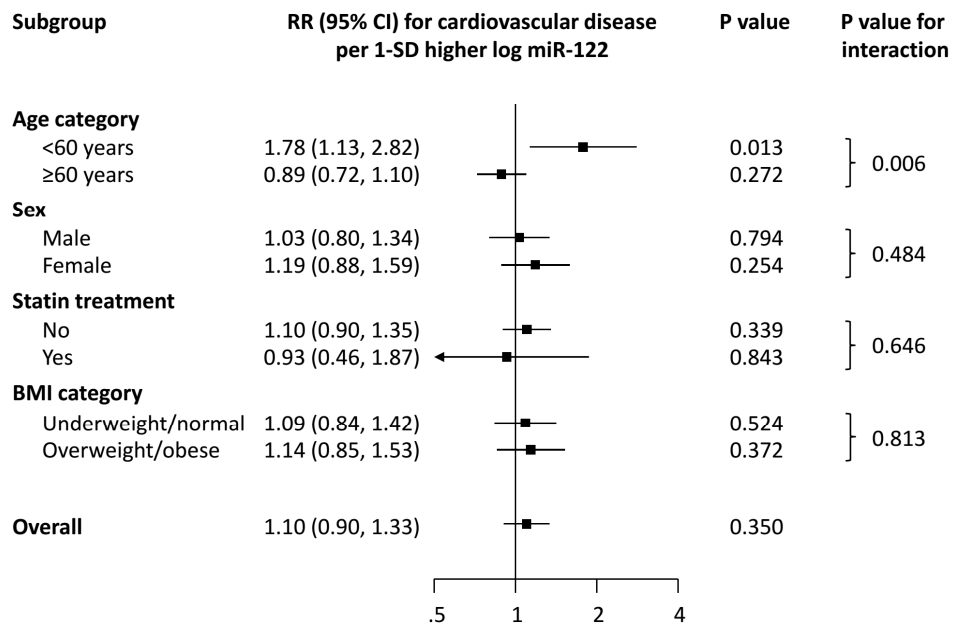

There were 108 new-onset events of cardiovascular disease. Risk ratios were adjusted for age, sex, socio-economic status, smoking, physical activity, and alcohol consumption.
